# Supplementary material for: NMR-Based Metabolomics: A New Paradigm to Unravel Defense-Related Metabolites in Insect-Resistant Cotton Variety through Different Multivariate Data Analysis Approaches
Source: MDPI journal article supplement (doi:10.3390/molecules28041763), 2023-02-13
Supplement: s1 [file s1]

## Supplementary Material

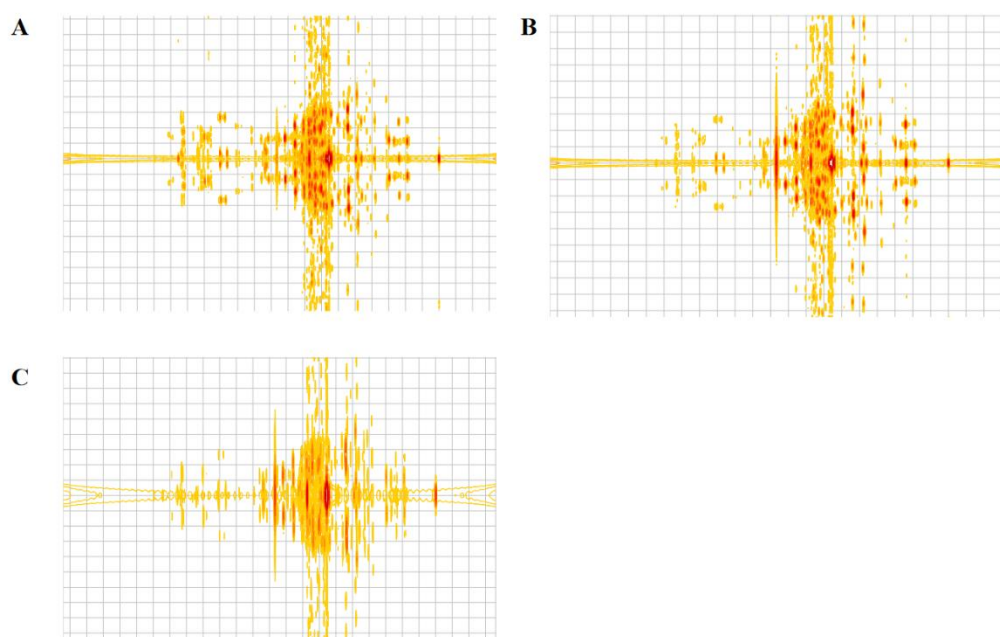

Supplementary Figure S1 (A) 2D J-resolve of FH-142; (B) 2D J-resolve of 496; (C) 2D J-resolve of MAC

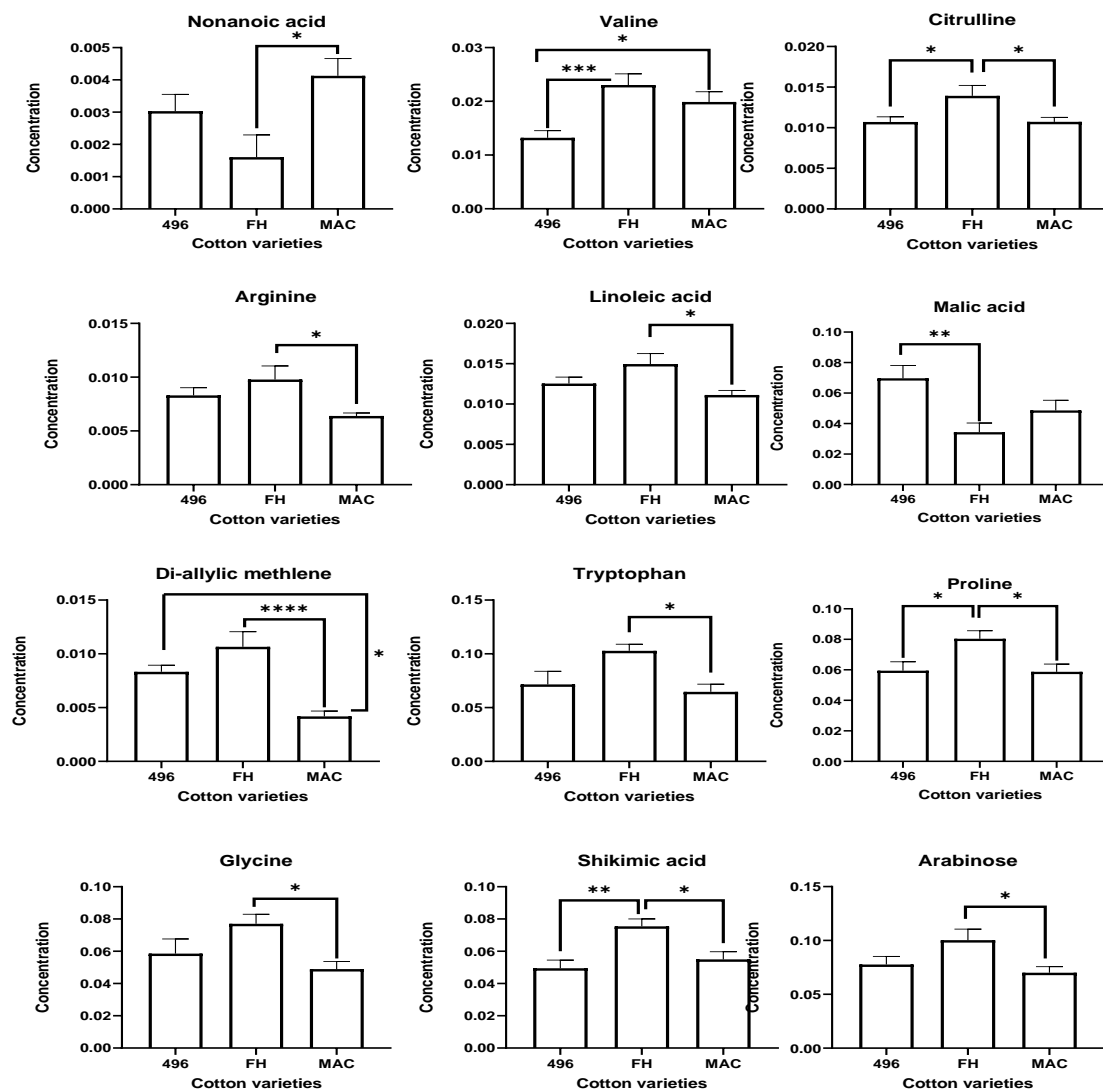

Figure S2 (A) Relative quantification of metabolites

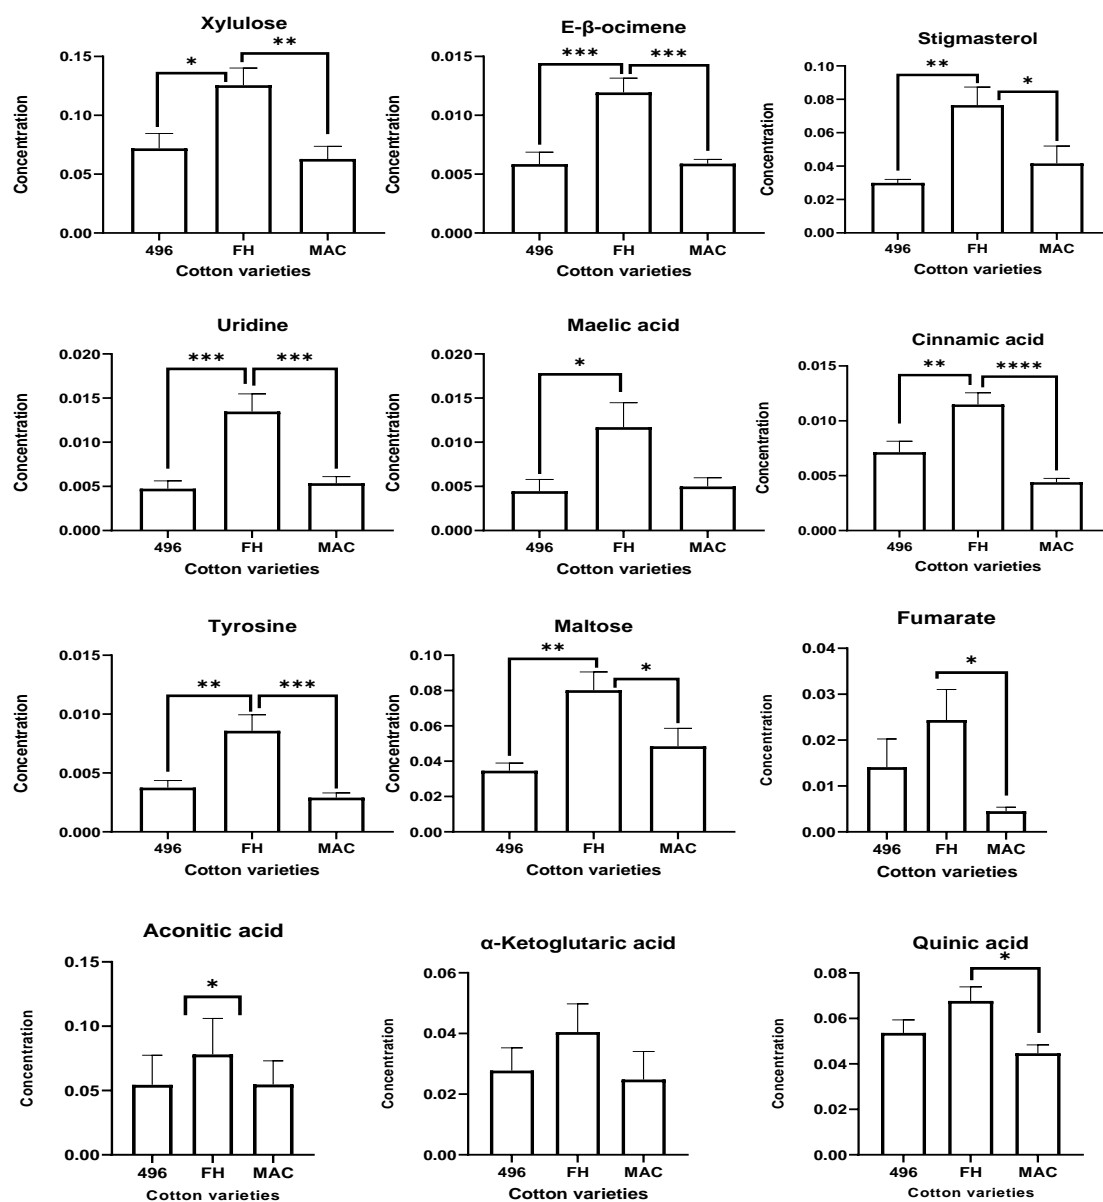

Figure S2 (B) Relative quantification of metabolites

Supplementary Table S1 Relative quantification of metabolites in different cotton varieties

| Sr. No. | Metabolites          | Concentration of metabolites $\pm$ SEM |                     |                     | Probability |         |                  |
|---------|----------------------|----------------------------------------|---------------------|---------------------|-------------|---------|------------------|
|         |                      | 496                                    | FH                  | MAC                 | 496×FH      | 496×MAC | FH × MAC         |
| 1       | Nonanoic acid        | 0.0030 $\pm$ 0.0005                    | 0.0016 $\pm$ 0.0006 | 0.0041 $\pm$ 0.0005 | ns          | Ns      | *                |
| 2       | Valine               | 0.0132 $\pm$ 0.0013                    | 0.0230 $\pm$ 0.0020 | 0.0198 $\pm$ 0.0019 | * *         | *       | ns               |
| 3       | Citrulline           | 0.0107 $\pm$ 0.0006                    | 0.0139 $\pm$ 0.0012 | 0.0107 $\pm$ 0.0005 | *           | Ns      | *                |
| 4       | Arginine             | 0.0083 $\pm$ 0.0007                    | 0.0097 $\pm$ 0.0012 | 0.0063 $\pm$ 0.0002 | ns          | Ns      | *                |
| 5       | Malic acid           | 0.0697 $\pm$ 0.0083                    | 0.0343 $\pm$ 0.0060 | 0.0486 $\pm$ 0.0066 | * *         | Ns      | ns               |
| 6       | Di-allylic methylene | 0.0083 $\pm$ 0.0006                    | 0.0107 $\pm$ 0.0014 | 0.0041 $\pm$ 0.0005 | ns          | * *     | *<br>*<br>*<br>* |
| 7       | Asparagine           | 0.0053 $\pm$ 0.0005                    | 0.0052 $\pm$ 0.0013 | 0.0021 $\pm$ 0.0005 | ns          | *       | *                |
| 8       | Tryptophan           | 0.0716 $\pm$ 0.0123                    | 0.103 $\pm$ 0.0061  | 0.0646 $\pm$ 0.0071 | ns          | Ns      | *                |
| 9       | Proline              | 0.0594 $\pm$ 0.0058                    | 0.0804 $\pm$ 0.0052 | 0.0587 $\pm$ 0.0050 | *           | Ns      | *                |
| 10      | Glycine              | 0.0585 $\pm$ 0.0090                    | 0.0771 $\pm$ 0.0059 | 0.0489 $\pm$ 0.0047 | ns          | Ns      | *                |
| 11      | Shikimic acid        | 0.0494 $\pm$ 0.0051                    | 0.0755 $\pm$ 0.0045 | 0.0550 $\pm$ 0.0047 | * *         | Ns      | *                |

|           |                             |                    |                       |                       |          |    |                  |
|-----------|-----------------------------|--------------------|-----------------------|-----------------------|----------|----|------------------|
| <b>12</b> | Arabinose                   | 0.0777 ±<br>0.0074 | 0.100 ±<br>0.0102     | 0.0701<br>±<br>0.0055 | ns       | Ns | *                |
| <b>13</b> | Xylulose                    | 0.0719 ±<br>0.0126 | 0.126 ±<br>0.0146     | 0.0629<br>±<br>0.0108 | *        | Ns | *<br>*           |
| <b>14</b> | E-β-<br>ocimene             | 0.0058 ±<br>0.0010 | 0.0119<br>±<br>0.0012 | 0.0058<br>±<br>0.0003 | * *<br>* | Ns | *<br>*<br>*      |
| <b>15</b> | Stigmaster<br>ol            | 0.0299 ±<br>0.0020 | 0.0765<br>±<br>0.0109 | 0.0416<br>±<br>0.0104 | * *      | Ns | *                |
| <b>16</b> | Maltose                     | 0.0346 ±<br>0.0043 | 0.0802<br>±<br>0.0104 | 0.0484<br>±<br>0.0102 | * *      | Ns | *                |
| <b>17</b> | Uridine                     | 0.0047 ±<br>0.0008 | 0.0135<br>±<br>0.0020 | 0.0053<br>±<br>0.0007 | * *<br>* | Ns | *<br>*<br>*      |
| <b>18</b> | Maelic<br>acid              | 0.0044 ±<br>0.0013 | 0.0117±<br>0.0027     | 0.0050<br>±<br>0.0009 | *        | Ns | ns               |
| <b>19</b> | Cinnamic<br>acid            | 0.0071 ±<br>0.0010 | 0.0115<br>±<br>0.0010 | 0.0044<br>±<br>0.0003 | * *      | ns | *<br>*<br>*<br>* |
| <b>20</b> | Tyrosine                    | 0.0037 ±<br>0.0005 | 0.0085<br>±<br>0.0013 | 0.0029<br>±<br>0.0003 | * *      | Ns | *<br>*<br>*      |
| <b>21</b> | Fumarate                    | 0.0141±<br>0.0061  | 0.0243±<br>0.066      | 0.0045±<br>0.0008     | ns       | Ns | *                |
| <b>22</b> | Aconitic<br>acid            | 0.0541±<br>0.0066  | 0.0780±<br>0.0080     | 0.0546±<br>0.0053     | *        | Ns | ns               |
| <b>23</b> | α-<br>Ketoglutari<br>c acid | 0.0277±<br>0.0075  | 0.0404±<br>0.0093     | 0.0248±<br>0.0092     | ns       | Ns | ns               |
| <b>24</b> | Succinic<br>acid            | 0.0176±<br>0.0093  | 0.0315±<br>0.0172     | 0.0134±<br>0.0048     | ns       | Ns | ns               |
| <b>25</b> | Quinic acid                 | 0.0536±<br>0.0057  | 0.0677±<br>0.0061     | 0.0446±<br>0.0036     | ns       | Ns | *                |
| <b>26</b> | Ferulic<br>acid             | 0.0047±<br>0.0008  | 0.0090±<br>0.001      | 0.0045±<br>0.0004     | * *      | Ns | *<br>*<br>*      |
